# Supplementary material for: Distinct dynein complexes defined by DYNLRB1 and DYNLRB2 regulate mitotic and male meiotic spindle bipolarity
Source: PubMed Central journal article supplement (PMC10042829; doi:10.1038/s41467-023-37370-7), 2023-03-27
Supplement: 41467_2023_37370_MOESM3_ESM.pdf [file 41467_2023_37370_MOESM3_ESM.pdf]

## **Description of Additional Supplementary Files**

File Name: Supplementary Data 1

Description: The list of primers and siRNA sequences used in this study.

File Name: Supplementary Movie 1

Description: Single-molecule imaging of GFP-dynein immunoprecipitated with FLAG-hDYNLRB1.

File Name: Supplementary Movie 2

Description: Single-molecule imaging of GFP-dynein immunoprecipitated with FLAG-hDYNLRB2.
